# Supplementary material for: Molecular Dynamics Study of Binding of µ-Conotoxin GIIIA to the Voltage-Gated Sodium Channel Nav1.4
Source: PubMed Central journal article supplement (PMC4136838; doi:10.1371/journal.pone.0105300), 2014-08-18
Supplement: pone.0105300.s001.pdf [file pone.0105300.s001.pdf]

**Supporting Information for**  
**Molecular Dynamics Study of Binding of  $\mu$ -Conotoxin GIIIA to**  
**the Voltage-Gated Sodium Channel Nav1.4**

**Somayeh Mahdavi and Serdar Kuyucak**

School of Physics, University of Sydney, New South Wales 2006, Australia

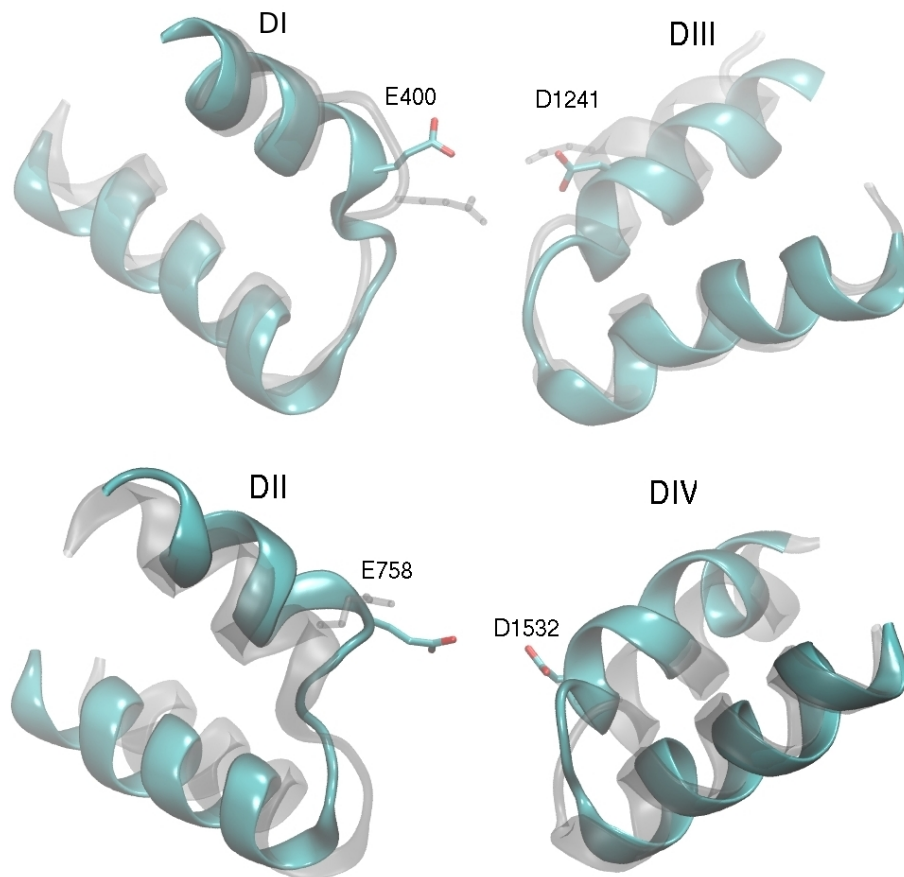

Figure 1: Snapshot comparing the pore domain of our Nav1.4 model with that of Chen et al. [75].
